# Supplementary material for: Expression of X-Linked Inhibitor of Apoptosis Protein (XIAP) in Breast Cancer Is Associated with Shorter Survival and Resistance to Chemotherapy
Source: MDPI journal article supplement (doi:10.3390/cancers13112807), 2021-06-04
Supplement: s1 [file s1]

## Supplementary Materials

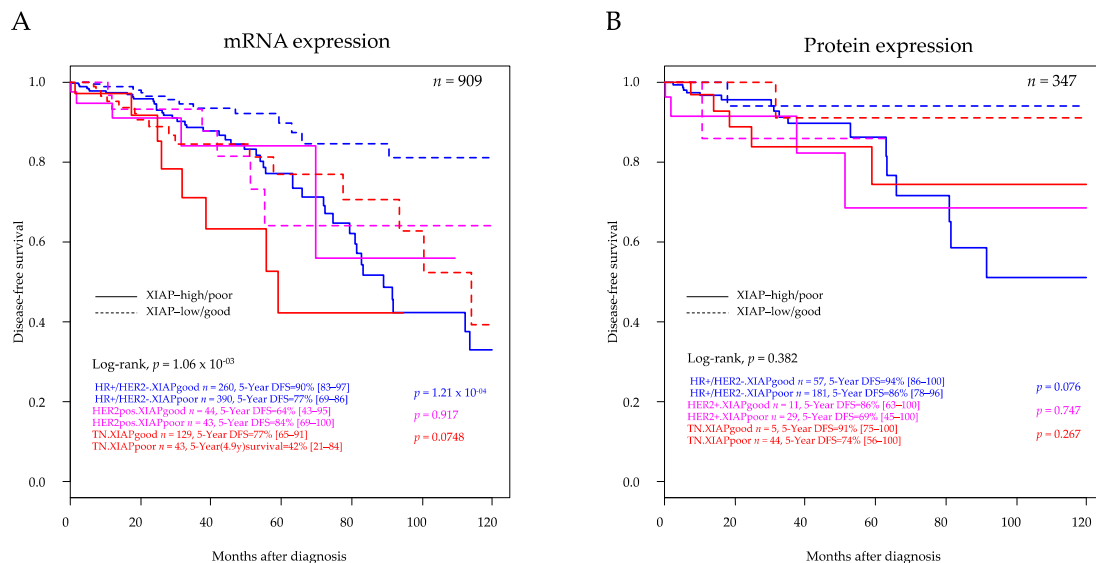

**Figure S1.** Disease-free survival according to XIAP expression in each molecular subtype. **(A)** Kaplan-Meier DFS curve in 909 patients *per* molecular subtype and according to high and low XIAP mRNA expression. The XIAP-low and XIAP-high groups were defined by the Cox model prediction. **(B)** Kaplan-Meier DFS curve in 347 patients *per* molecular subtype and according to high and low XIAP protein expression. The XIAP-low and XIAP-high groups were defined by the Cox model prediction.

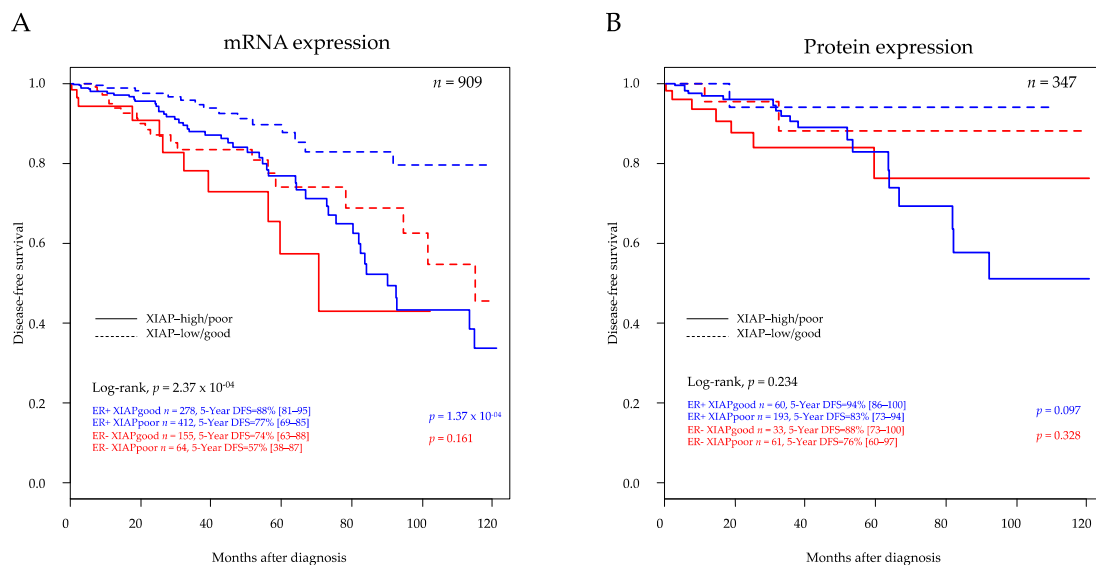

**Figure S2.** Disease-free survival according to XIAP expression in each ER status-based class. **(A)** Kaplan-Meier DFS curve in 909 patients *per* ER status and according to high and low XIAP mRNA expression. The XIAP-low and XIAP-high groups were defined by the Cox model prediction. **(B)** Kaplan-Meier DFS curve in 347 patients *per* ER status and according to high and low XIAP protein expression. The XIAP-low and XIAP-high groups were defined by the Cox model prediction.

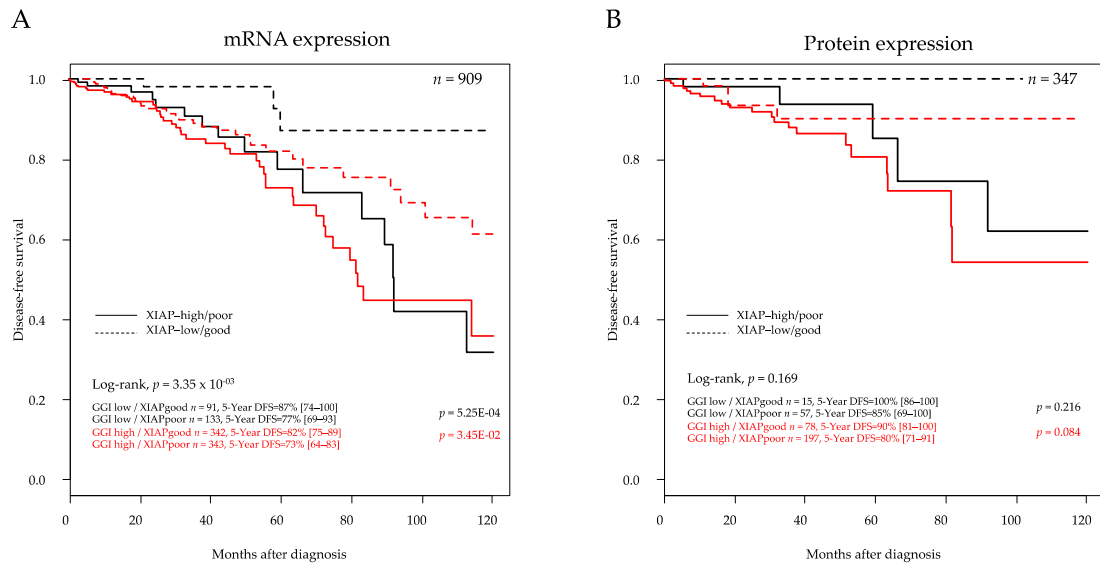

**Figure S3.** Disease-free survival according to XIAP expression in each grade-based class. **(A)** Kaplan-Meier DFS curve in 909 patients *per* grade-based class and according to high and low XIAP mRNA expression. The XIAP-low and XIAP-high groups were defined by the Cox model prediction. **(B)** Kaplan-Meier DFS curve in 347 patients *per* grade-based class and according to high and low XIAP protein expression. The XIAP-low and XIAP-high groups were defined by the Cox model prediction.

**Table S1.** List of breast cancer mRNA data sets included in the study.

| Reference                                           | Source of data               | Access Date | N° of samples | Technological platform      | N° of probe sets | N° of samples used in this study |
|-----------------------------------------------------|------------------------------|-------------|---------------|-----------------------------|------------------|----------------------------------|
| Hess KR et al.,<br>J Clin Oncol 2006 [1]            | MDA133                       | 04/11/2007  | 133           | Affymetrix U133A            | 22K              | 131                              |
| Bonnefoi et al.,<br>Lancet Oncol 2007 [2]           | GEO: GSE6861,<br>GSE4779     | 03/10/2010  | 161           | Affymetrix X3P              | 61K              | 125                              |
| Iwamoto T et al.,<br>J Natl Cancer Inst 2011<br>[3] | GEO: GSE22093                | 06/14/2012  | 164           | Affymetrix U133A            | 22K              | 100                              |
| Tabchy A et al.,<br>Clin Cancer Res 2010<br>[4]     | GEO: GSE20271                | 06/14/2012  | 178           | Affymetrix U133A            | 22K              | 178                              |
| Desmedt et al.,<br>J Clin Oncol 2011 [5]            | GEO: GSE16446                | 01/23/2012  | 120           | Affymetrix U133 Plus<br>2.0 | 54K              | 120                              |
| Hatzis C et al.,<br>JAMA 2011 [6]                   | GEO: GSE25066                | 01/03/2012  | 508           | Affymetrix U133A            | 22K              | 504                              |
| Popovici V et al.,<br>Breast Cancer Res 2010<br>[7] | GEO: GSE20194                | 03/02/2012  | 278           | Affymetrix U133A            | 22K              | 91                               |
| TCGA,<br>Nature 2012 [8]                            | TCGA Data Portal -<br>BRCA - | 10/28/2013  | 1215          | Illumina, RNAseq V2         | 20K              | 1092                             |
| TOTAL                                               |                              |             | 2757          |                             |                  | 2341                             |

**Table S2.** List of *XIAP* probe sets analyzed.

| Technological platform       | Probe set ID     | Blastn / XIAP (3 transcripts) |       |          |             | Number of corresponding data sets | Number of corresponding breast cancer samples* |
|------------------------------|------------------|-------------------------------|-------|----------|-------------|-----------------------------------|------------------------------------------------|
|                              |                  | Query                         | Cover | Identity | Specificity |                                   |                                                |
| Affymetrix, U133+2.0 & U133A | 206536_S_AT      | 100%                          | 100%  | 100%     | 100%        | 6                                 | 1124                                           |
| Affymetrix, X3P              | G1016687_3P_A_AT | 100%                          | 100%  | 100%     | 100%        | 1                                 | 125                                            |

**Table S3.** XIAP protein expression and clinicopathological variables.

| Variables                     | n   | Global<br>n (%) | XIAP protein      |                         |
|-------------------------------|-----|-----------------|-------------------|-------------------------|
|                               |     |                 | mean (range)      | p-value*                |
| Age at diagnosis (year)       |     |                 |                   | 0.819                   |
| ≤50                           | 106 | 106 (29%)       | 0.18 (−2.4–3.8)   |                         |
| >50                           | 261 | 261 (71%)       | 0.10 (−3.9–2.9)   |                         |
| Pathological type             |     |                 |                   | 3.35 × 10 <sup>−4</sup> |
| IDC                           | 315 | 315 (86%)       | 0.03 (−3.9–3.84)  |                         |
| ILC                           | 29  | 29 (8%)         | 0.66 (−0.6–2.3)   |                         |
| other                         | 23  | 23 (6%)         | 0.30 (−1.9–1.4)   |                         |
| Pathological lymph node (pN)  |     |                 |                   | 4.13 × 10 <sup>−2</sup> |
| negative                      | 140 | 140 (47%)       | 0.01 (−3.6–2.3)   |                         |
| positive                      | 158 | 158 (53%)       | 0.24 (−3.9–3.8)   |                         |
| Pathological size (pT)        |     |                 |                   | 0.991                   |
| pT1                           | 80  | 80 (22%)        | 0.03 (−3.9–3.8)   |                         |
| pT2–3                         | 286 | 286 (78%)       | 0.16 (−3.9–2.9)   |                         |
| Genomic grade (GGI)           |     |                 |                   | 0.156                   |
| low                           | 75  | 75 (20%)        | 0.30 (−2.3–1.6)   |                         |
| high                          | 291 | 291 (80%)       | 0.08 (−3.9–3.8)   |                         |
| ER status**                   |     |                 |                   | 1.74 × 10 <sup>−2</sup> |
| negative                      | 91  | 91 (25%)        | −0.21 (−3.9–2.3)  |                         |
| positive                      | 275 | 275 (75%)       | 0.20 (−3.9–3.8)   |                         |
| PR status**                   |     |                 |                   | 1.35 × 10 <sup>−2</sup> |
| negative                      | 142 | 142 (39%)       | −0.12 (−3.9–2.3)  |                         |
| positive                      | 224 | 224 (61%)       | 0.25 (−2.6–3.8)   |                         |
| HER2 status**                 |     |                 |                   | 0.373                   |
| negative                      | 297 | 297 (81%)       | 0.16 (−3.9–3.8)   |                         |
| positive                      | 69  | 69 (19%)        | 0.02 (−2.4–2.3)   |                         |
| Molecular subtype mRNA status |     |                 |                   | 0.076                   |
| HR+/HER2-                     | 237 | 237 (65%)       | 0.20 (−3.9–3.8)   |                         |
| HER2+                         | 69  | 69 (19%)        | 0.02 (−2.4–2.3)   |                         |
| TN                            | 61  | 61 (17%)        | −0.19 (−3.9–2.3)  |                         |
| PAM50 subtypes                |     |                 |                   | 3.12 × 10 <sup>−3</sup> |
| basal                         | 88  | 88 (24%)        | −0.30 (−3.9–2.3)  |                         |
| HER2                          | 63  | 63 (17%)        | 0.18 (−2.4–2.3)   |                         |
| luminal A                     | 82  | 82 (22%)        | 0.25 (−3.9–1.6)   |                         |
| luminal B                     | 108 | 108 (30%)       | 0.21 (−2.3–3.8)   |                         |
| normal-like                   | 25  | 25 (7%)         | 0.38 (−2.2–2.3)   |                         |
| DFS event                     |     |                 |                   | 0.250                   |
| no                            | 315 | 315 (91%)       | 0.12 (−3.9–3.84)  |                         |
| yes                           | 32  | 32 (9%)         | 0.21 (−1.46–2.19) |                         |
| 5-year DFS [95% CI]           | 347 | 84% [78–91]     |                   |                         |

GGI, genomic grade index; IDC, invasive ductal carcinoma; ILC, invasive lobular carcinoma; \* Student's t-test or one-way ANOVA; \*\*, mRNA status.

**Table S4.** Univariate and multivariate analyses for DFS in the "RNA population" by using XIAP expression as discrete value.

| Variables                             | n   | Univariate           |                         | n   | Multivariate         |                         |
|---------------------------------------|-----|----------------------|-------------------------|-----|----------------------|-------------------------|
|                                       |     | Hazard ratio [95%CI] | p-value                 |     | Hazard ratio [95%CI] | p-value                 |
| Age at diagnosis, >50 vs. ≤50         | 909 | 1.24 [0.81–1.88]     | 0.323                   |     |                      |                         |
| Genomic grade (GGI), high vs. low     | 909 | 1.30 [0.81–2.07]     | 0.275                   |     |                      |                         |
| Pathological lymph node, 1 vs. 0      | 776 | 2.05 [1.32–3.18]     | 1.40 × 10 <sup>−3</sup> | 776 | 1.96 [1.24–3.1]      | 3.70 × 10 <sup>−3</sup> |
| Pathological size, pT2–3 vs. pT1      | 908 | 1.15 [0.74–1.79]     | 0.536                   |     |                      |                         |
| Pathological type, lobular vs. ductal | 909 | 0.54 [0.28–1.04]     | 0.182                   |     |                      |                         |
| other vs. ductal                      |     | 0.99 [0.55–1.81]     |                         |     |                      |                         |
| Mol. subtype, HER2+ vs. HR+/HER2-     | 909 | 2.18 [1.31–3.63]     | 7.72 × 10 <sup>−4</sup> | 776 | 1.07 [0.53–2.14]     | 0.857                   |
| Mol. subtype TN vs. HR+/HER2-         |     | 2.13 [1.32–3.43]     |                         | 776 | 1.78 [1.04–3.05]     | 3.48 × 10 <sup>−2</sup> |

|                                    |     |                  |                       |     |                  |                       |
|------------------------------------|-----|------------------|-----------------------|-----|------------------|-----------------------|
| Amsterdam 70-gene, Poor vs. Good   | 909 | 2.46 [1.31–4.60] | $4.89 \times 10^{-3}$ | 776 | 2.01 [1.04–3.88] | $3.70 \times 10^{-2}$ |
| OncotypeDX, High vs. Low           | 909 | 1.60 [0.98–2.60] | 0.168                 |     |                  |                       |
| Intermediate vs. Low               |     | 1.33 [0.70–2.51] |                       |     |                  |                       |
| XIAP high vs. Low (discrete value) | 909 | 2.01 [1.35–3]    | $5.75 \times 10^{-4}$ | 776 | 2.17 [1.39–3.4]  | $7.10 \times 10^{-4}$ |

**Table S5.** Univariate and multivariate analyses for DFS in the "RPPA population".

| Variables                              | n   | Univariate       |                       |
|----------------------------------------|-----|------------------|-----------------------|
|                                        |     | HR [95%CI]       | p-value               |
| Age at diagnosis, >50 vs. ≤50 years    | 347 | 1.54 [0.71–3.35] | 0.272                 |
| Genomic grade (GGI), high vs. low      | 346 | 1.34 [0.57–3.13] | 0.499                 |
| Pathological lymph node, pos. vs. neg. | 288 | 1.09 [0.50–2.34] | 0.832                 |
| Pathological size, pT2–3 vs. pT1       | 347 | 1.12 [0.50–2.50] | 0.776                 |
| Pathological type, ILC vs. IDC         | 347 | 1.42 [0.42–4.79] | 0.491                 |
| other vs. IDC                          |     | 1.70 [0.67–4.29] |                       |
| Mol. subtype, HER2+ vs. HR+/HER2-      | 346 | 2.33 [0.99–5.50] | 0.151                 |
| Mol. subtype, TN vs. HR+/HER2-         |     | 1.15 [0.43–3.13] |                       |
| Amsterdam 70-gene risk, high vs. low   | 346 | 2.12 [0.74–6.09] | 0.162                 |
| Recurrence Score risk, high vs. low    | 346 | 1.20 [0.53–2.71] | 0.436                 |
| intermediate vs. low                   |     | 0.54 [0.14–2.06] |                       |
| XIAP continuous expression             | 347 | 1.50 [1.02–2.22] | $4.15 \times 10^{-2}$ |

GGI, genomic grade index; IDC, invasive ductal carcinoma; ILC, invasive lobular carcinoma; HR, Hazard ratio.

**Table S6.** Univariate and multivariate analyses for pCR to neoadjuvant chemotherapy by using XIAP expression as discrete value.

| pCR                                                        | Univariate |                   |                        | Multivariate |                   |                        |
|------------------------------------------------------------|------------|-------------------|------------------------|--------------|-------------------|------------------------|
|                                                            | n          | Odds-ratio [CI95] | p-value                | n            | Odds-ratio [CI95] | p-value                |
| Age at diagnosis (years), >50 vs. ≤50                      | 1202       | 0.86 [0.68–1.10]  | 0.262                  |              |                   |                        |
| Genomic Grade Index (GGI), high vs. low                    | 1203       | 2.10 [1.70–2.80]  | $7.65 \times 10^{-7}$  | 1203         | 1.6 [1.2–2.1]     | $3.45 \times 10^{-3}$  |
| Pathological lymph node status (pN), positive vs. negative | 253        | 0.83 [0.53–1.30]  | 0.508                  |              |                   |                        |
| Pathological tumor size (pT), pT2–3 vs. pT1                | 299        | 1.10 [0.58–2.00]  | 0.871                  |              |                   |                        |
| Pathological type, ILC vs. IDC                             | 510        | 1.60 [0.63–4.30]  | 0.397                  |              |                   |                        |
| Pathological type, other vs. IDC                           | 510        | 0.75 [0.46–1.20]  | 0.314                  |              |                   |                        |
| Molecular subtype, HER2+ vs. HR+/HER2-                     | 1203       | 3.80 [2.70–5.40]  | $1.12 \times 10^{-10}$ | 1203         | 3.5 [2.5–4.9]     | $4.03 \times 10^{-9}$  |
| Molecular subtype, TN vs. HR+/HER2-                        | 1203       | 3.60 [2.80–4.70]  | $2.22 \times 10^{-15}$ | 1203         | 3.1 [2.4–4.1]     | $8.77 \times 10^{-12}$ |
| XIAP, high vs. Low (discrete value)                        | 1203       | 0.71 [0.57–0.9]   | $1.53 \times 10^{-2}$  | 1203         | 0.79 [0.62–1]     | $9.32 \times 10^{-2}$  |

## References

- Hess, K.R.; Anderson, K.; Symmans, W.F.; Valero, V.; Ibrahim, N.; Mejia, J.A.; Booser, D.; Theriault, R.L.; Buzdar, A.U.; Dempsey, P.J.; et al. Pharmacogenomic Predictor of Sensitivity to Preoperative Chemotherapy with Paclitaxel and Fluorouracil, Doxorubicin, and Cyclophosphamide in *Breast Cancer*. *J. Clin. Oncol.* **2006**, *24*, 4236–4244, doi:10.1200/JCO.2006.05.6861.
- Bonnefoi, H.; Potti, A.; Delorenzi, M.; Mauriac, L.; Campone, M.; Tubiana-Hulin, M.; Petit, T.; Rouanet, P.; Jassem, J.; Blot, E.; et al. Validation of Gene Signatures That Predict the Response of Breast Cancer to Neoadjuvant Chemotherapy: A Substudy of the EORTC 10994/BIG 00-01 *Clinical Trial*. *Lancet Oncol.* **2007**, *8*, 1071–1078, doi:10.1016/S1470-2045(07)70345-5.
- Iwamoto, T.; Bianchini, G.; Booser, D.; Qi, Y.; Coutant, C.; Shiang, C.Y.-H.; Santarpia, L.; Matsuoka, J.; Hortobagyi, G.N.; Symmans, W.F.; et al. Gene Pathways Associated with Prognosis and Chemotherapy Sensitivity in Molecular Subtypes of *Breast Cancer*. *J. Natl. Cancer Inst.* **2011**, *103*, 264–272, doi:10.1093/jnci/djq524.
- Tabchy, A.; Valero, V.; Vidaurre, T.; Lluch, A.; Gomez, H.; Martin, M.; Qi, Y.; Barajas-Figueroa, L.J.; Souchon, E.; Coutant, C.; et al. Evaluation of a 30-Gene Paclitaxel, Fluorouracil, Doxorubicin, and Cyclophosphamide Chemotherapy Response Predictor in a Multicenter Randomized Trial in *Breast Cancer*. *Clin. Cancer Res.* **2010**, *16*, 5351–5361, doi:10.1158/1078-0432.CCR-10-1265.
- Desmedt, C.; Di Leo, A.; de Azambuja, E.; Larsimont, D.; Haibe-Kains, B.; Selleslags, J.; Delaloge, S.; Duhem, C.; Kains, J.-P.; Carly, B.; et al. Multifactorial Approach to Predicting Resistance to Anthracyclines. *J. Clin. Oncol.* **2011**, *29*, 1578–1586, doi:10.1200/JCO.2010.31.2231.

- 6 Hatzis, C.; Pusztai, L.; Valero, V.; Booser, D.J.; Esserman, L.; Lluch, A.; Vidaurre, T.; Holmes, F.; Souchon, E.; Wang, H.; et al. A Genomic Predictor of Response and Survival Following Taxane-Anthracycline Chemotherapy for Invasive Breast Cancer. *JAMA* **2011**, *305*, 1873–1881, doi:10.1001/jama.2011.593.
- 7 Popovici, V.; Chen, W.; Gallas, B.G.; Hatzis, C.; Shi, W.; Samuelson, F.W.; Nikolsky, Y.; Tsyganova, M.; Ishkin, A.; Nikolskaya, T.; et al. Effect of Training-Sample Size and Classification Difficulty on the Accuracy of Genomic Predictors. *Breast Cancer Res.* **2010**, *12*, R5, doi:10.1186/bcr2468.
- 8 Koboldt, D.C.; Fulton, R.S.; McLellan, M.D.; Schmidt, H.; Kalicki-Veizer, J.; McMichael, J.F.; Fulton, L.L.; Dooling, D.J.; Ding, L.; Mardis, E.R.; et al. Comprehensive molecular portraits of human breast tumours. *Nature* 2012, *490*, 61–70, doi:10.1038/nature11412.
